# Supplementary material for: Endocardial Fibroelastosis as an Independent Predictor of Atrioventricular Valve Rupture in Maternal Autoimmune Antibody Exposed Fetus: A Systematic Review with Clinicopathologic Analysis
Source: MDPI journal article supplement (doi:10.3390/diagnostics13081481), 2023-04-20
Supplement: s1 [file s1]

Supplementary tables:

**Table 1: PRISMA checklist**

| Section/topic                      | #  | PRISMA Checklist item                                                                                                                                                                                                                                                                                       | Reported on page #                |
|------------------------------------|----|-------------------------------------------------------------------------------------------------------------------------------------------------------------------------------------------------------------------------------------------------------------------------------------------------------------|-----------------------------------|
| <b>TITLE</b>                       |    |                                                                                                                                                                                                                                                                                                             |                                   |
| Title                              | 1  | Identify the report as a systematic review, meta-analysis, or both.                                                                                                                                                                                                                                         | 1                                 |
| <b>ABSTRACT</b>                    |    |                                                                                                                                                                                                                                                                                                             |                                   |
| Structured summary                 | 2  | Provide a structured summary including, as applicable: background; objectives; data sources; study eligibility criteria, participants, and interventions; study appraisal and synthesis methods; results; limitations; conclusions and implications of key findings; systematic review registration number. | 1-2                               |
| <b>INTRODUCTION</b>                |    |                                                                                                                                                                                                                                                                                                             |                                   |
| Rationale                          | 3  | Describe the rationale for the review in the context of what is already known.                                                                                                                                                                                                                              | 3                                 |
| Objectives                         | 4  | Provide an explicit statement of questions being addressed with reference to participants, interventions, comparisons, outcomes, and study design (PICOS).                                                                                                                                                  | 3                                 |
| <b>METHODS</b>                     |    |                                                                                                                                                                                                                                                                                                             |                                   |
| Protocol and registration          | 5  | Indicate if a review protocol exists, if and where it can be accessed (e.g., Web address), and, if available, provide registration information including registration number.                                                                                                                               | 11                                |
| Eligibility criteria               | 6  | Specify study characteristics (e.g., PICOS, length of follow-up) and report characteristics (e.g., years considered, language, publication status) used as criteria for eligibility, giving rationale.                                                                                                      | 11                                |
| Information sources                | 7  | Describe all information sources (e.g., databases with dates of coverage, contact with study authors to identify additional studies) in the search and date last searched.                                                                                                                                  | 11                                |
| Search                             | 8  | Present full electronic search strategy for at least one database, including any limits used, such that it could be repeated.                                                                                                                                                                               | Supplement-Search strategy report |
| Study selection                    | 9  | State the process for selecting studies (i.e., screening, eligibility, included in systematic review, and, if applicable, included in the meta-analysis).                                                                                                                                                   | 11                                |
| Data collection process            | 10 | Describe method of data extraction from reports (e.g., piloted forms, independently, in duplicate) and any processes for obtaining and confirming data from investigators.                                                                                                                                  | 11                                |
| Data items                         | 11 | List and define all variables for which data were sought (e.g., PICOS, funding sources) and any assumptions and simplifications made.                                                                                                                                                                       | 11                                |
| Risk of bias in individual studies | 12 | Describe methods used for assessing risk of bias of individual studies (including specification of whether this was done at the study or outcome level), and how this information is to be used in any data synthesis.                                                                                      | 11                                |
| Summary                            | 13 | State the principal summary measures (e.g., risk ratio, difference in                                                                                                                                                                                                                                       | N/A                               |

|                               |    |                                                                                                                                                                                                          |                    |
|-------------------------------|----|----------------------------------------------------------------------------------------------------------------------------------------------------------------------------------------------------------|--------------------|
| measures                      |    | means).                                                                                                                                                                                                  |                    |
| Synthesis of results          | 14 | Describe the methods of handling data and combining results of studies, if done, including measures of consistency (e.g., $I^2$ ) for each meta-analysis.                                                | N/A                |
| <b>RESULTS</b>                |    |                                                                                                                                                                                                          |                    |
| Study selection               | 17 | Give numbers of studies screened, assessed for eligibility, and included in the review, with reasons for exclusions at each stage, ideally with a flow diagram.                                          | Figure 9           |
| Study characteristics         | 18 | For each study, present characteristics for which data were extracted (e.g., study size, PICOS, follow-up period) and provide the citations.                                                             | Table 1,2,3        |
| Risk of bias within studies   | 19 | Present data on risk of bias of each study and, if available, any outcome level assessment (see item 12).                                                                                                | Supplement table 2 |
| Results of individual studies | 20 | For all outcomes considered (benefits or harms), present, for each study: (a) simple summary data for each intervention group (b) effect estimates and confidence intervals, ideally with a forest plot. | N/A                |
| Synthesis of results          | 21 | Present results of each meta-analysis done, including confidence intervals and measures of consistency.                                                                                                  | N/A                |
| Risk of bias across studies   | 22 | Present results of any assessment of risk of bias across studies (see Item 15).                                                                                                                          | N/A                |
| Additional analysis           | 23 | Give results of additional analyses, if done (e.g., sensitivity or subgroup analyses, meta-regression [see Item 16]).                                                                                    | N/A                |
| <b>DISCUSSION</b>             |    |                                                                                                                                                                                                          |                    |
| Summary of evidence           | 24 | Summarize the main findings including the strength of evidence for each main outcome; consider their relevance to key groups (e.g., healthcare providers, users, and policy makers).                     | 21-25              |
| Limitations                   | 25 | Discuss limitations at study and outcome level (e.g., risk of bias), and at review-level (e.g., incomplete retrieval of identified research, reporting bias).                                            | 25-26              |
| Conclusions                   | 26 | Provide a general interpretation of the results in the context of other evidence, and implications for future research.                                                                                  | 26                 |
| <b>FUNDING</b>                |    |                                                                                                                                                                                                          |                    |
| Funding                       | 27 | Describe sources of funding for the systematic review and other support (e.g., supply of data); role of funders for the systematic review.                                                               | N/A                |

## Search Strategy Report

Researcher: Kotecha Monika Kantilal

Topic: Atrioventricular valve rupture in neonatal lupus

Date: 15/8/2022

Update: 18/3/2023

## PubMed

| Set | Terms                                                                                                                                                                             |
|-----|-----------------------------------------------------------------------------------------------------------------------------------------------------------------------------------|
| #1  | (Mitral OR tricuspid OR atrioventricular OR valve OR cardiac OR heart OR chord* OR valv* OR papillary) AND (rupture* OR insufficiency OR regurgi* OR repair) AND (humans[Filter]) |

|    |                                                                                                                                                                                |
|----|--------------------------------------------------------------------------------------------------------------------------------------------------------------------------------|
| #2 | ("Neonatal lupus" OR "maternal Lupus" OR "Maternal Autoimmunity" OR "maternal antibodies" OR lupus OR "Anti Ro" OR "anti La" OR "anti SSA" OR "anti SSB") AND (humans[Filter]) |
| #3 | #1 AND #2                                                                                                                                                                      |
| #4 | Echocardiography AND (humans[Filter])                                                                                                                                          |
| #5 | Autopsy OR Immunohistochemistry OR immunopathology AND (humans[Filter])                                                                                                        |
| #6 | #2 AND #4                                                                                                                                                                      |
| #7 | #2 AND #5                                                                                                                                                                      |

#### Embase

| Set | Terms                                                                                                                                                                                                                                                                                                                                                                                                                                                               |
|-----|---------------------------------------------------------------------------------------------------------------------------------------------------------------------------------------------------------------------------------------------------------------------------------------------------------------------------------------------------------------------------------------------------------------------------------------------------------------------|
| #1  | ('rupture'/exp OR 'rupture') AND ('heart rupture':ti,ab,kw OR 'chordal rupture':ti,ab,kw OR 'mitral valve regurgitation':ti,ab,kw OR 'atrioventricular valve':ti,ab,kw OR 'tricuspid valve disease':ti,ab,kw OR 'tricuspid valve regurgitation':ti,ab,kw OR 'myopericarditis':ti,ab,kw OR 'lymphocytic myocarditis':ti,ab,kw OR 'myocarditis':ti,ab,kw OR 'papillary muscle rupture':ti,ab,kw OR 'heart valve surgery':ti,ab,kw OR 'mitral valve surgery':ti,ab,kw) |
| #2  | 'lupus' OR 'lupus erythematosus':ti,ab,kw OR 'autoimmunity':ti,ab,kw OR 'maternal antibody':ti,ab,kw OR 'antinuclear antibody':ti,ab,kw OR 'la antibody':ti,ab,kw OR 'lupus anticoagulant':ti,ab,kw OR 'ro 52 antibody':ti,ab,kw OR 'ro 60 antibody':ti,ab,kw OR 'ro antibody':ti,ab,kw                                                                                                                                                                             |
| #3  | #1 AND #2 AND ([embryo]/lim OR [fetus]/lim OR [newborn]/lim OR [infant]/lim OR [child]/lim OR [preschool]/lim OR [school]/lim OR [adolescent]/lim)                                                                                                                                                                                                                                                                                                                  |
| #4  | 'endocardial fibroelastosis'/exp                                                                                                                                                                                                                                                                                                                                                                                                                                    |
| #5  | 'autopsy'/exp                                                                                                                                                                                                                                                                                                                                                                                                                                                       |
| #6  | 'immunohistochemistry'/exp                                                                                                                                                                                                                                                                                                                                                                                                                                          |
| #7  | #2 AND #4 ([embryo]/lim OR [fetus]/lim OR [newborn]/lim OR [infant]/lim OR [child]/lim OR [preschool]/lim OR [school]/lim OR [adolescent]/lim)                                                                                                                                                                                                                                                                                                                      |
| #8  | #2 AND #5 ([embryo]/lim OR [fetus]/lim OR [newborn]/lim OR [infant]/lim OR [child]/lim OR [preschool]/lim OR [school]/lim OR [adolescent]/lim)                                                                                                                                                                                                                                                                                                                      |
| #9  | #2 AND #6 ([embryo]/lim OR [fetus]/lim OR [newborn]/lim OR [infant]/lim OR [child]/lim OR [preschool]/lim OR [school]/lim OR [adolescent]/lim)                                                                                                                                                                                                                                                                                                                      |
| #10 |                                                                                                                                                                                                                                                                                                                                                                                                                                                                     |

Scopus:

#### Scopus query final:

(TITLE-ABS-KEY(( "heart disease" ) OR heart OR mitral OR tricuspid OR chord\* OR atrioventricular OR ( "papillary muscle" ) OR valv\* OR cardiac OR heart OR papillary AND (rupture\* OR regurgitation\* OR insufficienc\* OR repair))) AND ("Neonatal lupus" OR "maternal Lupus" OR "Maternal Autoimmunity" OR "maternal antibodies" OR "Anti Ro" OR "anti La" OR "anti SSA" OR "anti SSB" OR lupus OR "Ro 52 antibody" OR "Ro 60 antibody" OR "Ro antibody") AND ( LIMIT-TO ( SUBJAREA,"MEDI" ) OR LIMIT-TO ( SUBJAREA,"BIOC" ) OR LIMIT-TO ( SUBJAREA,"IMMU" ) OR LIMIT-TO ( SUBJAREA,"PHAR" ) OR LIMIT-TO ( SUBJAREA,"HEAL" ) OR LIMIT-TO ( SUBJAREA,"MATE" ) OR LIMIT-TO ( SUBJAREA,"DECI" ) OR LIMIT-TO ( SUBJAREA,"Undefined" ) OR LIMIT-TO ( SUBJAREA,"MULT" ) ) AND ( EXCLUDE ( EXACTKEYWORD,"Middle Aged" ) OR EXCLUDE ( EXACTKEYWORD,"Nonhuman" ) OR EXCLUDE ( EXACTKEYWORD,"Aged, 80 And Over" ) OR EXCLUDE ( EXACTKEYWORD,"Animals" ) OR EXCLUDE ( EXACTKEYWORD,"Middle Age" ) OR EXCLUDE ( EXACTKEYWORD,"Very Elderly" ) OR EXCLUDE ( EXACTKEYWORD,"Animal" ) OR EXCLUDE ( EXACTKEYWORD,"Kidney Failure" ) OR EXCLUDE ( EXACTKEYWORD,"Renal Insufficiency, Chronic" ) OR EXCLUDE ( EXACTKEYWORD,"Acetylsalicylic Acid" ) OR EXCLUDE ( EXACTKEYWORD,"Animal Experiment" ) OR EXCLUDE ( EXACTKEYWORD,"Mouse" ) OR EXCLUDE ( EXACTKEYWORD,"Mice" ) OR EXCLUDE ( EXACTKEYWORD,"Cyclophosphamide" ) OR EXCLUDE ( EXACTKEYWORD,"Animal Tissue" ) OR

EXCLUDE ( EXACTKEYWORD,"Young Adult" ) OR EXCLUDE ( EXACTKEYWORD,"In Vitro Study" ) OR EXCLUDE ( EXACTKEYWORD,"Kidney" ) ) AND ( EXCLUDE ( EXACTKEYWORD,"Adult" ) OR EXCLUDE ( EXACTKEYWORD,"Deep Vein Thrombosis" ) )

Web of science:

Query 1: TS=(( "heart disease" ) OR heart OR mitral OR tricuspid OR chord\* OR atrioventricular OR papillary OR valv\* OR cardiac OR heart OR papillary AND (rupture\* OR regurgitation\* OR insufficienc\* OR repair)) and 1.37 Cardiology - General or 1.94 Cardiac Arrhythmia or 1.71 Cardiology - Circulation or 1.218 Autonomic Regulation or 1.79 Molecular & Cell Biology - Physiology or 1.134 Trauma & Emergency Surgery or 1.154 Assisted Ventilation or 1.102 Stem Cell Research or 1.75 Blood Clotting or 1.72 Obstetrics & Gynecology or 1.168 Vascular, Cardiac & Thoracic Surgery or 1.6 Immunology or 1.159 Membrane Channels & Receptors or 1.25 Molecular & Cell Biology - Cancer, Autophagy & Apoptosis or 1.96 Cell Biology or 1.106 Rheumatology or 1.132 Extracellular Matrix & Cell Differentiation or 7.57 Modelling & Simulation or 1.208 Vasculitis & Autoimmune Disorders or 1.281 Auto-inflammatory Diseases or 1.156 Healthcare Policy or 1.189 Genome Studies or 1.257 Birth Defects or 1.175 Medical Physics or 1.155 Medical Ethics or 1.204 Molecular & Cell Biology - Immunotherapy or 1.103 Blood Disorders or 2.123 Protein Structure, Folding & Modelling or 1.286 Immunology & Hematology or 8.212 Sensors & Tomography or 5.250 Imaging & Tomography or 6.11 Education & Educational Research or 1.152 Molecular & Cell Biology - Dna Damage (Citation Topics Meso) and Cardiac Cardiovascular Systems or Surgery or Peripheral Vascular Disease or Medicine General Internal or Pharmacology Pharmacy or Physics Applied or Anatomy Morphology or Critical Care Medicine or Biochemistry Molecular Biology or Physiology or Cell Biology or Medicine Research Experimental or Pediatrics or Hematology or Emergency Medicine or Multidisciplinary Sciences or Obstetrics Gynecology or Immunology or Health Care Sciences Services or Rheumatology or Medical Laboratory Technology or Medical Informatics or Microscopy or Allergy or Ethnic Studies or Education Educational Research or Primary Health Care (Web of Science Categories) and Cardiovascular System Cardiology or General Internal Medicine or Surgery or Pharmacology Pharmacy or Physiology or Biochemistry Molecular Biology or Cell Biology or Research Experimental Medicine or Pediatrics or Hematology or Science Technology Other Topics or Radiology Nuclear Medicine Medical Imaging or Rheumatology or Biophysics or Immunology or Medical Laboratory Technology or Medical Informatics or Pathology or Biotechnology Applied Microbiology or Anatomy Morphology or Materials Science or Allergy or Imaging Science Photographic Technology or Medical Ethics (Research Areas)

Query 2: TS=("Neonatal lupus" OR "maternal Lupus" OR "Maternal Autoimmunity" OR "maternal antibodies" OR "Anti Ro" OR "anti La" OR "anti SSA" OR "anti SSB" OR lupus OR "Ro 52 antibody" OR "Ro 60 antibody" OR "Ro antibody") and 1.106 Rheumatology or 1.6 Immunology or 1.75 Blood Clotting or 1.208 Vasculitis & Autoimmune Disorders or 1.286 Immunology & Hematology or 1.25 Molecular & Cell Biology - Cancer, Autophagy & Apoptosis or 1.72 Obstetrics & Gynecology or 1.103 Blood Disorders or 1.37 Cardiology - General or 1.54 Molecular & Cell Biology - Genetics or 1.239 Tissue Barriers or 1.65 Allergy or 1.102 Stem Cell Research or 1.132 Extracellular Matrix & Cell Differentiation or 1.127 Molecular & Cell Biology - Pharmacology or 1.141 Hormone Therapy or 1.189 Genome Studies or 1.281 Auto-inflammatory Diseases or 1.204 Molecular & Cell Biology - Immunotherapy or 1.94 Cardiac Arrhythmia or 1.71 Cardiology - Circulation or 1.257 Birth Defects or 1.112 Palliative Care or 9.92 Statistical Methods or 1.168 Vascular, Cardiac & Thoracic Surgery or 1.155 Medical Ethics or 1.96 Cell Biology or 1.225 Hematologic Diseases or 1.307 Laboratory Medicine or 5.250 Imaging & Tomography or 1.254 Ultrasound In Medicine or 6.3 Management (Citation Topics Meso) and Rheumatology or Immunology or General Internal Medicine or Hematology or Research Experimental Medicine or Biochemistry Molecular Biology or Cardiovascular System Cardiology or Cell



|                                                                                  |     |     |     |         |     |     |     |     |     |     |     |
|----------------------------------------------------------------------------------|-----|-----|-----|---------|-----|-----|-----|-----|-----|-----|-----|
| 5. Was the intervention(s) or treatment procedure(s) clearly described?          | Yes | Yes | Yes | Unclear | Yes | Yes | Yes | Yes | Yes | Yes | no  |
| 6. Was the post-intervention clinical condition clearly described?               | Yes | Yes | Yes | Unclear | Yes | Yes | Yes | Yes | Yes | Yes | no  |
| 7. Were adverse events (harms) or unanticipated events identified and described? | Yes | Yes | Yes | Unclear | Yes | Yes | Yes | Yes | Yes | Yes | no  |
| 8. Does the case report provide takeaway lessons?                                | Yes | Yes | Yes | Yes     | Yes | Yes | Yes | Yes | Yes | Yes | yes |

Low bias = 6 yes; Moderate bias = 4 yes; High bias = 2 or less yes).

\*Shiraishi et al is survey of 94 cases of mitral valve rupture of which we selected only one case with neonatal lupus at etiology and hence we use JBI tool for this case.

# Mawad et al is a research article on effect of steroids on lupus positive pregnancy. Atrioventricular valve rupture is noted in two patients however due to high bias the study was excluded.
