# Supplementary material for: Endocardial Fibroelastosis as an Independent Predictor of Atrioventricular Valve Rupture in Maternal Autoimmune Antibody Exposed Fetus: A Systematic Review with Clinicopathologic Analysis
Source: Diagnostics (Basel). 2023 Apr 20;13(8):1481. doi: 10.3390/diagnostics13081481 (PMC10137427; doi:10.3390/diagnostics13081481)
Supplement: Supplementary file 1 [file diagnostics-13-01481-s001.zip]

Archive with 13 entries (13 files):
- Supplementary material/Supplementary material.pdf
- Supplementary material/Video S1.mp4
- Supplementary material/Video S10.mp4
- Supplementary material/Video S11.mp4
- Supplementary material/Video S12.mp4
- Supplementary material/Video S2.mp4
- Supplementary material/Video S3.mp4
- Supplementary material/Video S4.mp4
- Supplementary material/Video S5.mp4
- Supplementary material/Video S6.mp4
- Supplementary material/Video S7.mp4
- Supplementary material/Video S8.mp4
- Supplementary material/Video S9.mp4
